# Supplementary material
Source: PubMed Central journal article supplement (PMC6428435)
Supplement: NIHMS1503155-supplement-1.pdf [file NIHMS1503155-supplement-1.pdf]

**Table S2.** Gas flow adjustment according to the temperature inside the quartz tube in order to maintain a constant residence time.

| T (°C) | Adjusted flow rate<br>(mL/min) |
|--------|--------------------------------|
| 78.8   | 488.6                          |
| 149.5  | 385.3                          |
| 256.1  | 318.1                          |
| 359    | 270.8                          |
| 460    | 235.8                          |
| 564.8  | 208.8                          |
| 672    | 187.3                          |
