# Supplementary material
Source: PubMed Central journal article supplement (PMC6428435)
Supplement: NIHMS1503155-supplement-2.pdf [file NIHMS1503155-supplement-2.pdf]

**Table S1** Summary of reported concentrations of carbonyls and brief description of the electronic cigarette (ECIG) type, coil type, the battery power, the coil temperature (T) and the humectant (propylene glycol (PG) and Vegetable Glycerin (VG)) content. Also included is the explanation of the high emission and variability of carbonyls in different systems.

| ECIG type                              | Coil type          | Power (W)                          | Coil T (°C) | PG/VG ratio | Carbonyls (µg/L vapor)                                                                         | High carbonyls in vapors are associated with: |                                          |                                                                  | Reference                |
|----------------------------------------|--------------------|------------------------------------|-------------|-------------|------------------------------------------------------------------------------------------------|-----------------------------------------------|------------------------------------------|------------------------------------------------------------------|--------------------------|
|                                        |                    |                                    |             |             |                                                                                                | Humectant                                     | Other Factors                            | Power                                                            |                          |
| Tank device                            | Single bottom coil | 4.27–9.6                           | NA          | 100/0–0/100 | FA (0.0-0.1)<br>AA (0.0-0.1)<br>Acet (0.1-0.3)<br>BA (0.0-0.2)                                 | PG                                            | Nicotine solvents                        | Battery voltage                                                  | Kosmider et al. (2014)   |
| NA                                     | NA                 | NA                                 | NA          | NA          | FA (ND-61.8)<br>AA (ND-47.3)<br>Acr (ND-12.0)<br>PA (ND-27.3)<br>GA (ND-29.1)<br>MGA (ND-22.0) | ECIG liquid                                   | ECIG liquid in contact with the hot coil | Battery voltage                                                  | Bekki et al. (2014)      |
| Tank device                            | NA                 | 3.3-5 V (resistance not mentioned) | NA          | NA          | FA hemiacetal (ND-760)                                                                         | PG and VG oxidizing reactions                 |                                          | ECIG operating at 5 V                                            | Jensen et al. (2015)     |
| Tank device                            | NA                 | 6.5-10.0                           | NA          | 50/50       | FA (ND-689.2)<br>AA (ND-412.6)<br>Acet (ND-45.0)<br>Acr (ND-420.8)                             |                                               | Dry-puff                                 | Minimal emission under normal and newer generation of high-power | Farsalinos et al. (2015) |
| Disposable, prefilled and tank devices | Single coil        | 3.1-6.7                            | NA          | 80/20–0/100 | FA (0.6-5.1)<br>AA (0.5-21.2)<br>Acet (0.7-3.5)<br>Acr (0-1.4)<br>PA (0-2.9)                   | No correlation with PG/VG ratio               |                                          | ECIG brand and power output                                      | El-Hellani et al. (2016) |
| Third                                  | Single             | 5.0-25.0                           | Dry coil:   | 45/55       | FA (0.5-31.2)                                                                                  | Oxidation of                                  |                                          | Battery                                                          | Geiss et al.             |

|                            |                                                           |          |                                               |                  |                                                                                                         |                                                               |                                                                                                                               |                                                   |                        |
|----------------------------|-----------------------------------------------------------|----------|-----------------------------------------------|------------------|---------------------------------------------------------------------------------------------------------|---------------------------------------------------------------|-------------------------------------------------------------------------------------------------------------------------------|---------------------------------------------------|------------------------|
| generation MODs device     | bottom coil                                               |          | 380-950<br>Wet Coil:<br>120-320               |                  | AA (0.3-7.0)<br>Acr (0-0.1)                                                                             | VG                                                            |                                                                                                                               | output                                            | (2016)                 |
| Tank device                | Single bottom coil or single top coil or dual bottom coil | 5.2-25.0 | NA                                            | 50/50            | FA (0-0.9)<br>AA (0-0.7)<br>Acr (0-0.1)                                                                 | Aerosol and liquid decomposition as competing pathways        | Dry puff                                                                                                                      | Device type and power                             | Gilman et al. (2016)   |
| Direct dripper             | Direct-dripping atomizer                                  | 4.6      | 130-350                                       | 100/0            | FA (8.6-38.4)<br>AA (117.5-511.4)<br>Acet (12.3-85.8)<br>Acr (0-0.7)<br>PA (22.5-137.2)<br>BA (0.3-2.7) | Maximum coil temperature ranged from 130°C to more than 350°C | Local liquid dry-out and local overheating                                                                                    | Dripping leads to potentially higher temperatures | Talih et al. (2016)    |
| Tank device                | Single or dual coil                                       | 4.2-9.2  | Temperature of the emitted vapor was measured | 50/50 or unknown | FA (1060.0-1940.0)<br>AA (200.0-1000.0)<br>Acr (60.0-430.0)                                             |                                                               | <ul style="list-style-type: none"> <li>Higher for a single-coil versus a double-coil</li> <li>Ageing of the device</li> </ul> | Higher voltage                                    | Sleiman et al. (2016)  |
| Prefilled and tank devices | Single coil                                               | 4.6-16.6 | NA                                            | NA               | FA (0.2-900.9)<br>AA (0.2-584.7)<br>Acet (1.4-888.7)<br>Acr (0-17.8)<br>PA (0.7-19.7)                   |                                                               | Puffing topography                                                                                                            | Battery power                                     | Ogunwale et al. (2017) |

| BA (0.5-14.9)                        |                                       |          |        |       |                                                                                                                       |                                                   |                 |                                                                                                      |                                   |
|--------------------------------------|---------------------------------------|----------|--------|-------|-----------------------------------------------------------------------------------------------------------------------|---------------------------------------------------|-----------------|------------------------------------------------------------------------------------------------------|-----------------------------------|
| Tank device                          | Single and dual coil                  | 4.0-15.0 | NA     | 56/44 | AA<br>Acet<br>Acr<br>PA                                                                                               | ECIG device design                                | Metal catalysis | Power latent heat transfer from the coils to the liquid                                              | Jensen et al. (2017)              |
| Pyrolysis reactor                    | Stainless steel tube                  | NA       | 50-318 | 50/50 | FA (0.2-500.0)<br>AA (ND-132.0)<br>Acr (ND-24.0)                                                                      | Increases with the liquid mass consumed by vapers |                 | Detected at 215 °C for both PG and VG<br>Recommend to examine the effect of different heating metals | Wang et al. (2017)                |
| Sub-ohm and regular ECIG tank device | Sub-ohm coils and regular single coil | 4-100    | NA     | 50/50 | FA (5.1-24.2)<br>AA (8.4-288.1)<br>Acet (2.3-55.4)<br>Acr (0-1.3)<br>PA (0.6-24.7)<br>GA (0-15.5)<br>MGA (31.4-185.5) | Liquid consumed                                   |                 | Power per unit heating coil surface area is a superior predictor than power alone                    | Talih et al. (recently submitted) |
